# Supplementary material for: Predictive algorithm to stratify newborns at-risk for child undernutrition in India: Secondary analysis of the National Family Health Survey-4
Source: PubMed Central journal article supplement (PMC9107290; doi:10.7189/jogh.12.04040), 2022-05-14
Supplement: jogh-12-04040-s001.pdf [file jogh-12-04040-s001.pdf]

**Table S1: Results of weighted logistic regression for the outcome of Comprehensive Index of Anthropometric Failure (CIAF) and stunting in the first 5 years of life based on data from 2015-16 National Family Health Survey in India**

| Risk Factors                             | CIAF |      |      | Stunting |      |      |
|------------------------------------------|------|------|------|----------|------|------|
|                                          | OR   | LCI  | UCI  | OR       | LCI  | UCI  |
| <b>Maternal height: &gt; 5'2"</b>        | Ref  |      |      |          |      |      |
| 4'8" to < 5'2"                           | 1.41 | 1.34 | 1.48 | 1.58     | 1.49 | 1.67 |
| < 4'8"                                   | 2.20 | 2.07 | 2.33 | 2.62     | 2.45 | 2.81 |
| <b>Maternal education: &gt; 10 years</b> | Ref  |      |      |          |      |      |
| No formal education                      | 1.56 | 1.48 | 1.65 | 1.72     | 1.61 | 1.84 |
| 1-7 years of schooling                   | 1.35 | 1.28 | 1.43 | 1.44     | 1.34 | 1.53 |
| >7-10 years of schooling                 | 1.19 | 1.13 | 1.25 | 1.25     | 1.18 | 1.32 |
| <b>Sex: Female</b>                       | Ref  |      |      |          |      |      |
| Male                                     | 1.10 | 1.07 | 1.14 | 1.15     | 1.11 | 1.20 |
| <b>Birth interval &gt; 24 months</b>     | Ref  |      |      |          |      |      |
| <= 24 months                             | 1.25 | 1.20 | 1.31 | 1.35     | 1.28 | 1.42 |
| <b>Birthweight: &gt; 2500 grams</b>      | Ref  |      |      |          |      |      |
| < 1800 grams                             | 2.42 | 2.20 | 2.66 | 2.04     | 1.84 | 1.32 |
| 1800 – 2500 grams                        | 1.59 | 1.53 | 1.65 | 1.43     | 1.37 | 1.49 |
| <b># Siblings: Zero or One</b>           | Ref  |      |      |          |      |      |
| Two or more                              | 1.07 | 1.03 | 1.11 | 1.14     | 1.09 | 1.21 |
| <b>Low Caste: No</b>                     | Ref  |      |      |          |      |      |
| Yes                                      | 1.15 | 1.10 | 1.20 | 1.15     | 1.09 | 1.21 |
| <b>Toilet access: Yes</b>                | Ref  |      |      |          |      |      |
| No                                       | 1.20 | 1.15 | 1.25 | 1.16     | 1.10 | 1.21 |
| <b>Partially finished House: Yes</b>     | Ref  |      |      |          |      |      |
| No                                       | 1.13 | 1.08 | 1.18 | 1.02     | 0.97 | 1.07 |
| <b>Separate kitchen: Yes</b>             | Ref  |      |      |          |      |      |

|                                        |      |      |      |      |      |      |
|----------------------------------------|------|------|------|------|------|------|
| No                                     | 1.07 | 1.03 | 1.12 | 1.05 | 1.01 | 1.10 |
| <b>Cooking fuel: Non-solid Fuel</b>    | Ref  |      |      |      |      |      |
| Solid fuel                             | 1.08 | 1.03 | 1.12 | 1.13 | 1.07 | 1.18 |
| <b>Uses soap after toilet use: Yes</b> | Ref  |      |      |      |      |      |
| No                                     | 1.08 | 1.04 | 1.12 | 1.04 | 1.00 | 1.08 |
| <b>State Focus: Normal</b>             | Ref  |      |      |      |      |      |
| Northeast Focus                        | 0.85 | 0.80 | 0.90 | 0.95 | 0.88 | 1.02 |
| Other Focus                            | 0.80 | 0.76 | 0.83 | 0.89 | 0.84 | 0.93 |
| <b>High Priority District: No</b>      | Ref  |      |      |      |      |      |
| Yes                                    | 0.92 | 0.88 | 0.95 | 0.98 | 0.93 | 1.02 |
| <b>District CIAF%: 20 – 39.9%</b>      | Ref  |      |      |      |      |      |
| 40 – 49.9%                             | 1.33 | 1.21 | 1.47 | 1.48 | 0.78 | 2.81 |
| 50 – 59.9%                             | 1.83 | 1.67 | 2.01 | 1.68 | 0.89 | 3.17 |
| 60 – 69.9%                             | 2.40 | 2.18 | 2.63 | 2.16 | 1.15 | 4.07 |
| 70 – 79.9%                             | 3.03 | 2.75 | 3.35 | 2.86 | 1.52 | 5.40 |
| 80 – 89.9%                             | 5.16 | 3.88 | 6.86 | 3.75 | 1.90 | 7.40 |
| <b>Multivariable c-statistic</b>       | 0.68 |      |      | 0.67 |      |      |
